# Supplementary material
Source: PubMed Central journal article supplement (PMC3437840)
Supplement: 1211611109_sfig01.pdf [file 1211611109_sfig01.pdf]

# A. Fatty acid synthesis

Author: Kam Dahlquist and Chris Evelo et al.  
 Maintained by: Chris Evelo for NuGO  
 E-mail: mapps@bigcat.unimaas.nl  
 Last modified: Inferred from human  
 http://www.bigcat.unimaas.nl/mapps/  
 Copyright © Gladstone Institutes and BIGCaT Bioinformatics

## Fatty Acid Biosynthesis

Gene Database  
 Mm-Std\_20070817.gdb  
 Expression Dataset  
 Name: fpkm4genMapp  
 Color Set: KO/WT <= 0.8  
 Legend: KO/WT >= 1.2  
 KO/WT <= 0.8  
 No criteria met  
 Not found

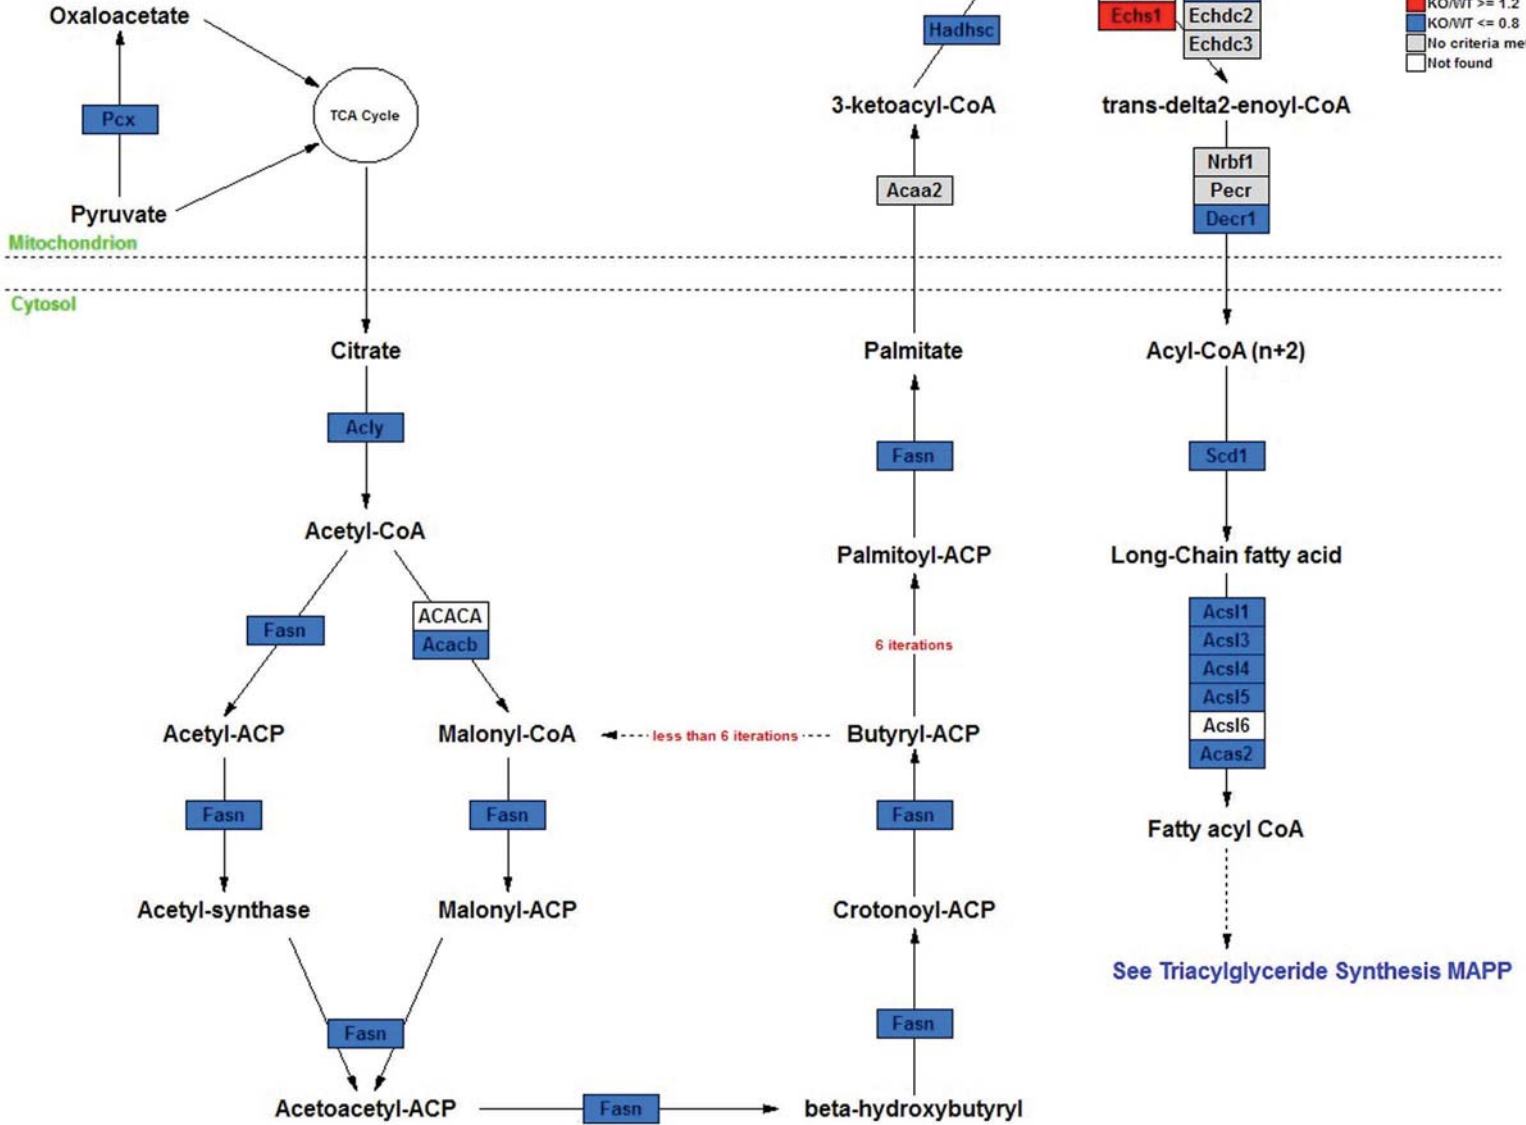

## B. Triglyceride synthesis

Author: Chris Evelo et al.  
 Maintained by: Chris Evelo for NuGO  
 E-mail: mapps@bigcat.unimaas.nl  
 Last modified: Inferred from human  
 http://www.bigcat.unimaas.nl/mapps/  
 Copyright © 2005, BiGCaT Bioinformatics

### Triacylglyceride Synthesis

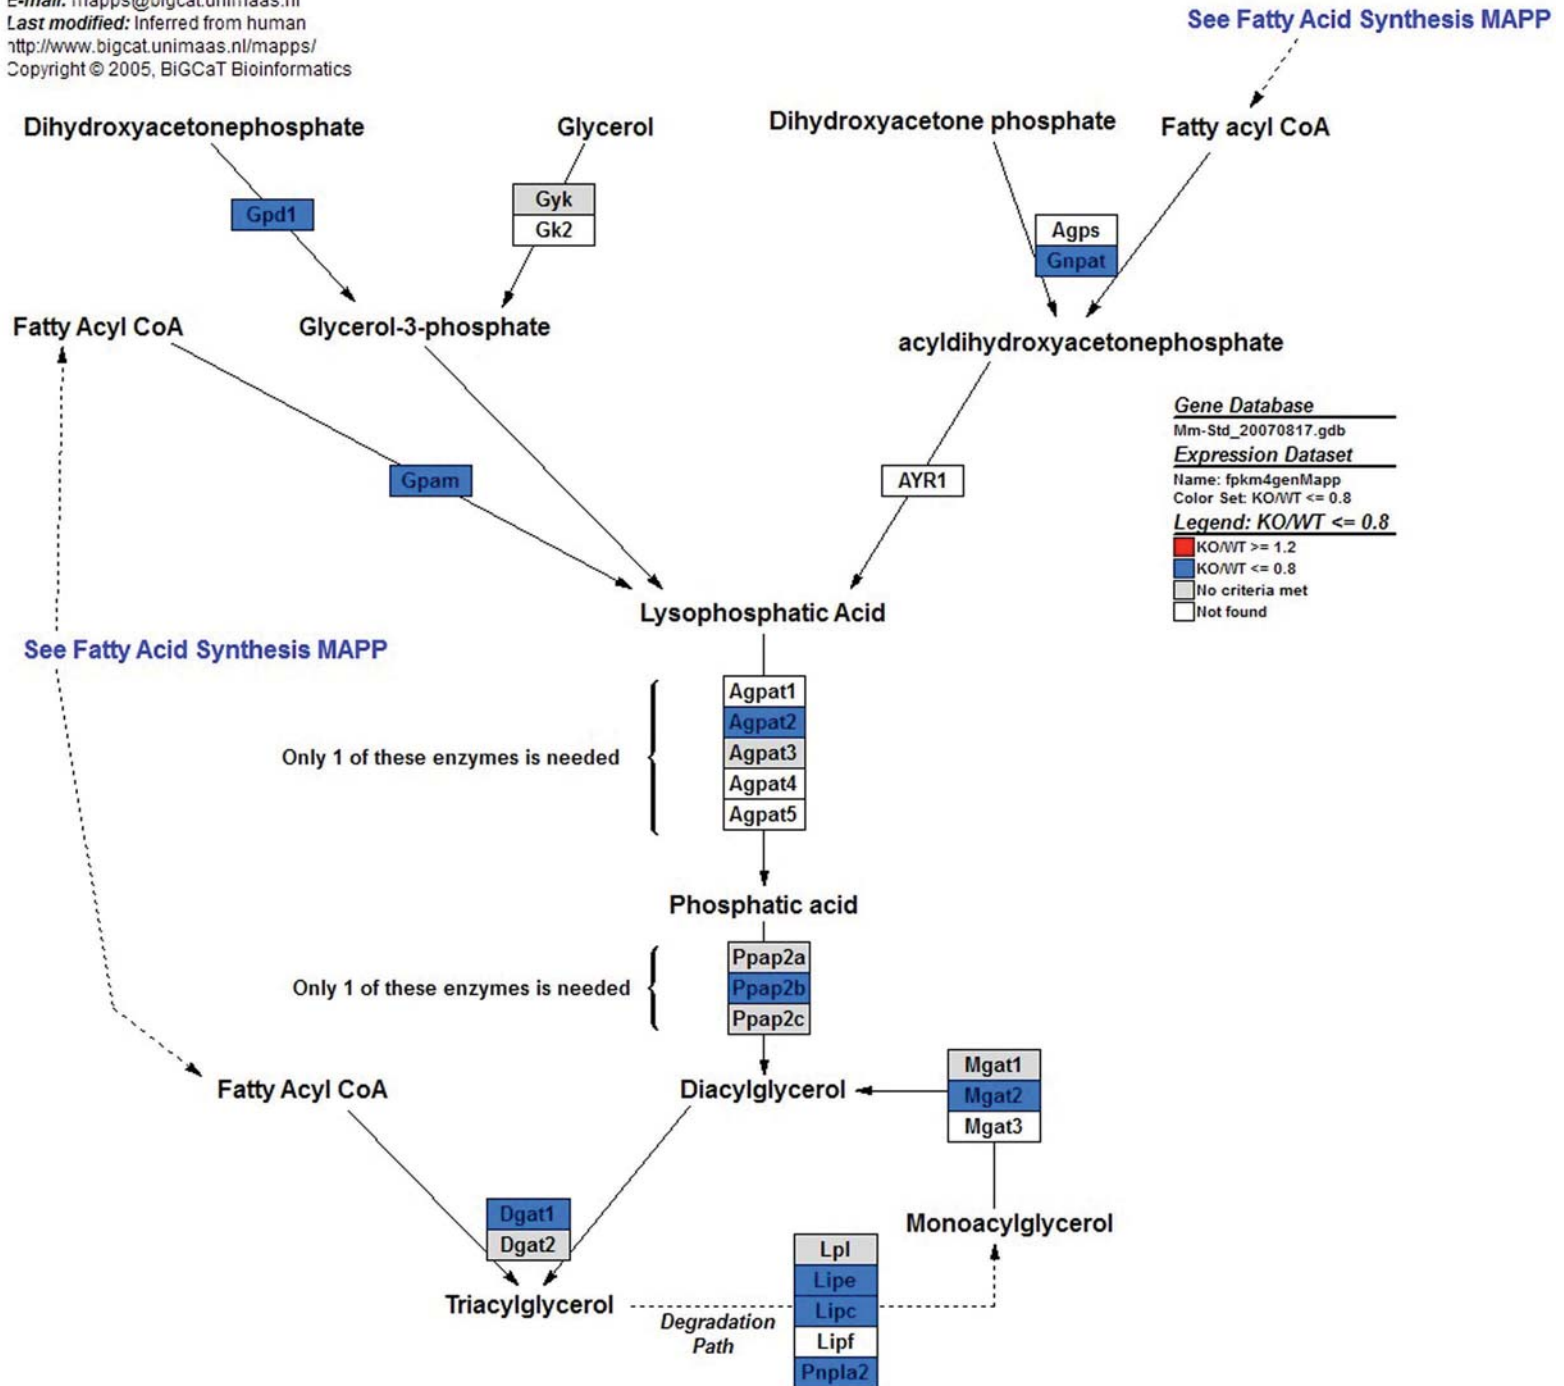

## C. Cholesterol synthesis

**Author:** Michael Lieberman and Ned Mantei  
**E-mail:** genmapp@gladstone.ucsf.edu  
 Right click for notes  
 Copyright © 2004, Gladstone Institutes

## Cholesterol Biosynthesis

### Fatty Acid Degradation

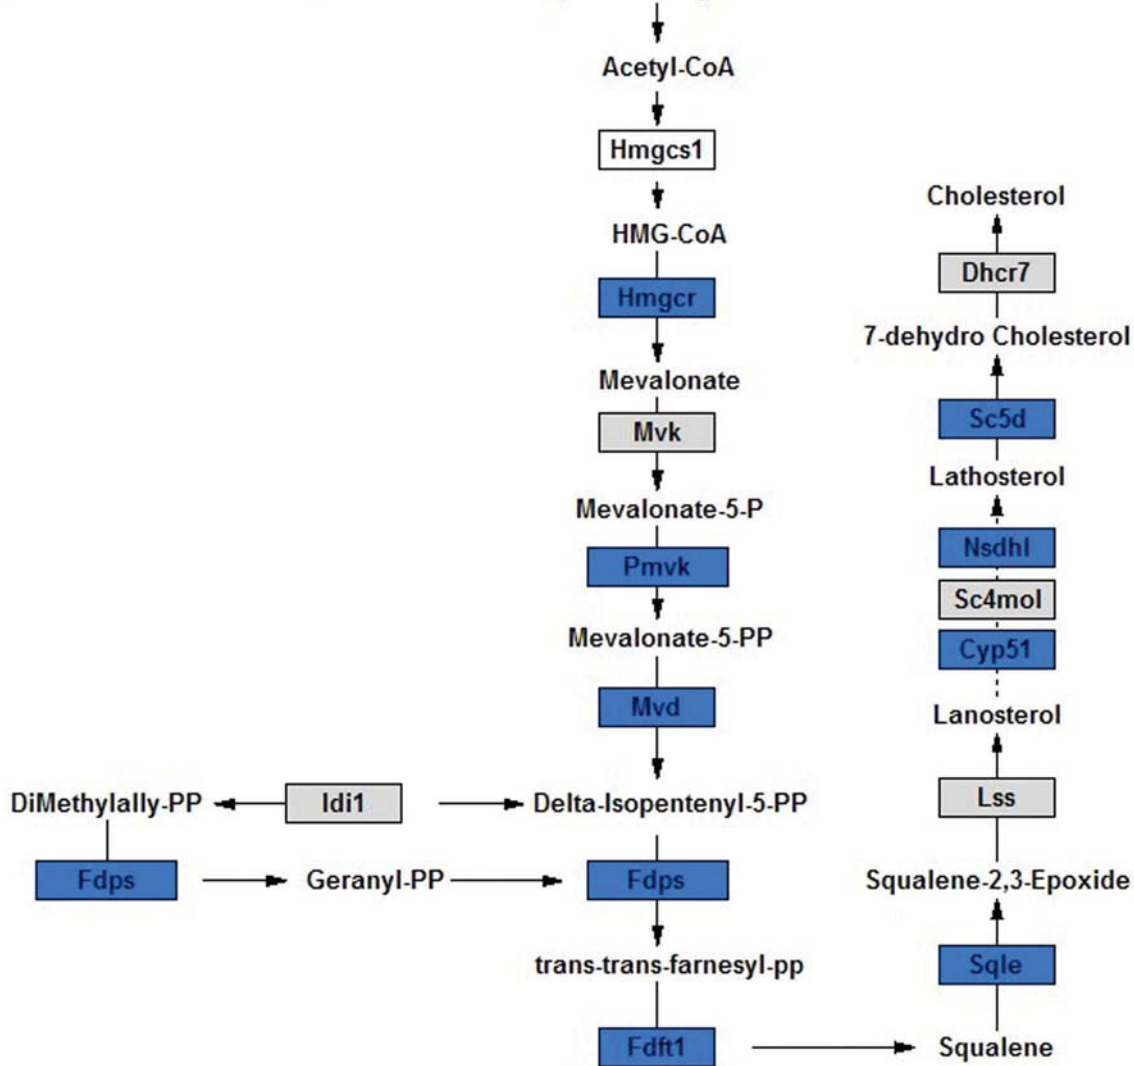

### Gene Database

Mm-Std\_20070817.gdb

### Expression Dataset

Name: fpkm4genMapp

Color Set: KO/WT <= 0.8

### Legend: KO/WT <= 0.8

- KO/WT >= 1.2
- KO/WT <= 0.8
- No criteria met
- Not found

D. Fatty acid beta oxidation

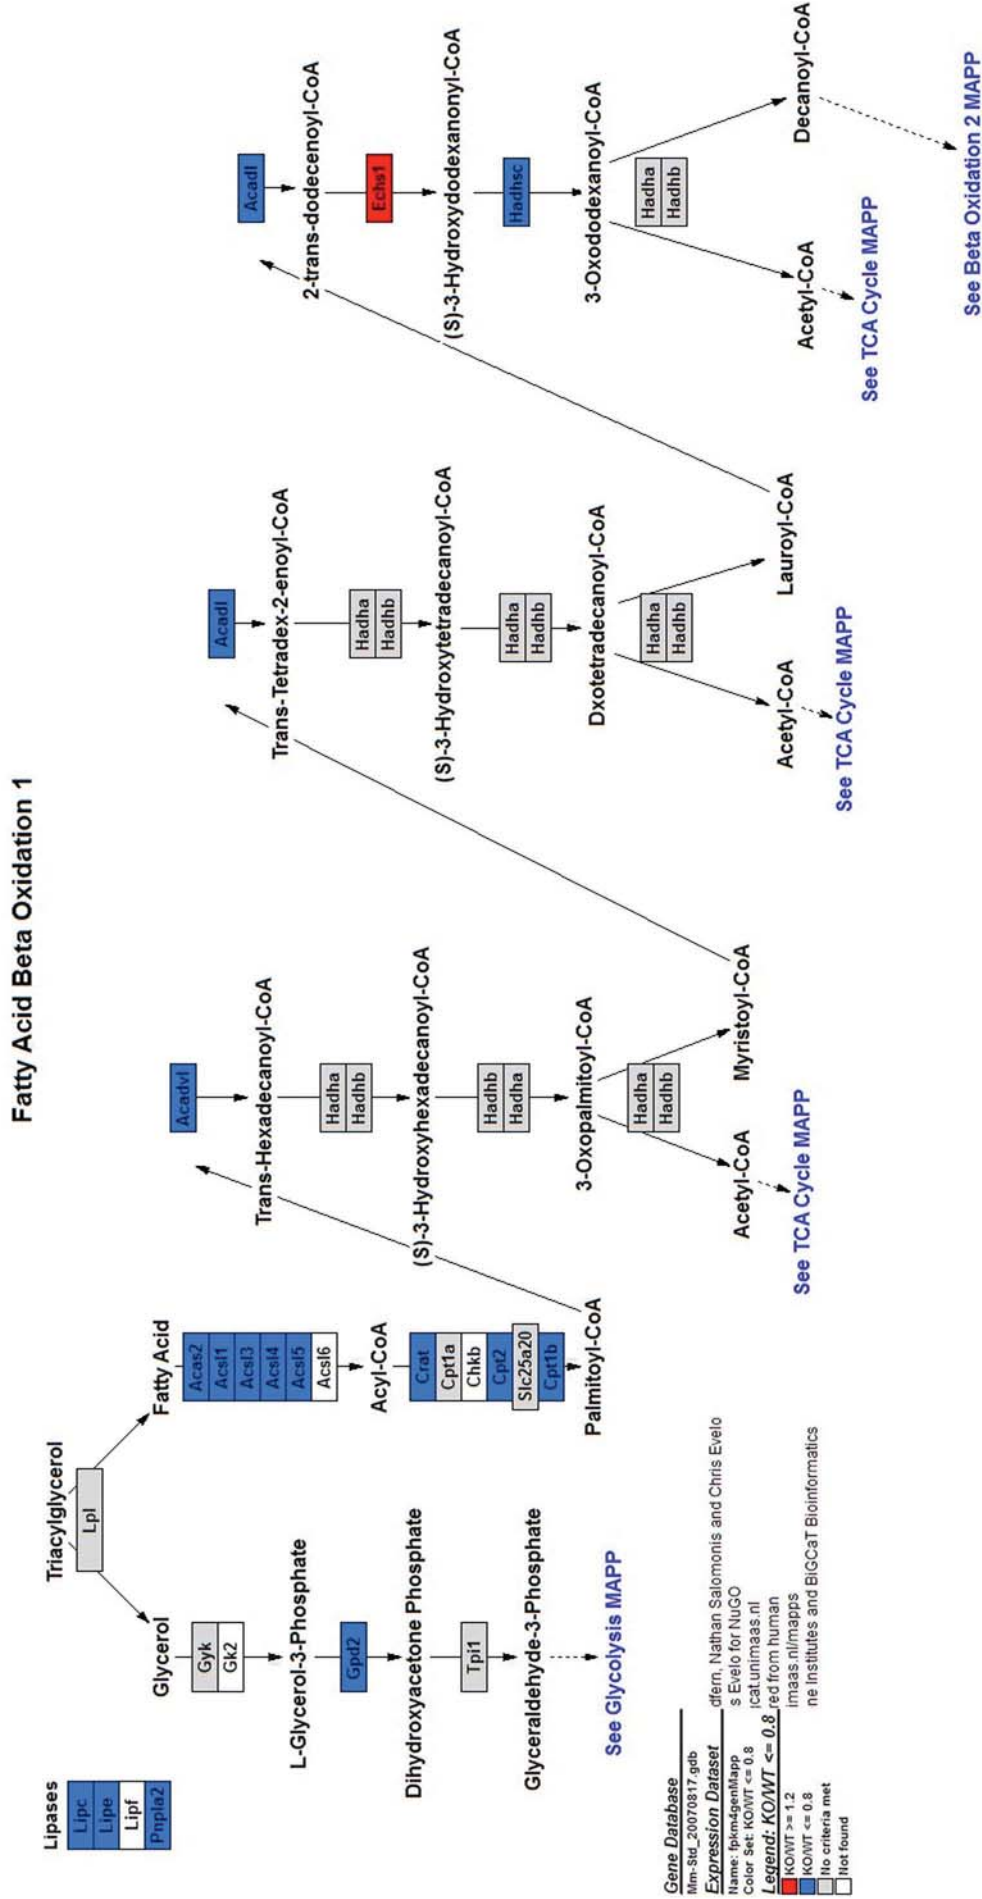

## Fatty Acid Beta Oxidation 2

Author: Charles Radfern, Nathan Salomonis and Chris Evelo  
 Maintained by: Chris Evelo for NUGO  
 E-mail: mapps@bigcat.unimaas.nl  
 Last modified: Inferred from human  
 http://www.bigcat.unimaas.nl/mapps  
 Copyright © 2005, BIGCAT Bioinformatics

Gene Database  
 Mm-Std\_20070817.gdb  
 Expression Dataset  
 Name: fpkm4gen/mapp  
 Color Set: KO/WT <= 0.8  
 Legend: KO/WT <= 0.8  
 KO/WT >= 1.2  
 No criteria met  
 Not found

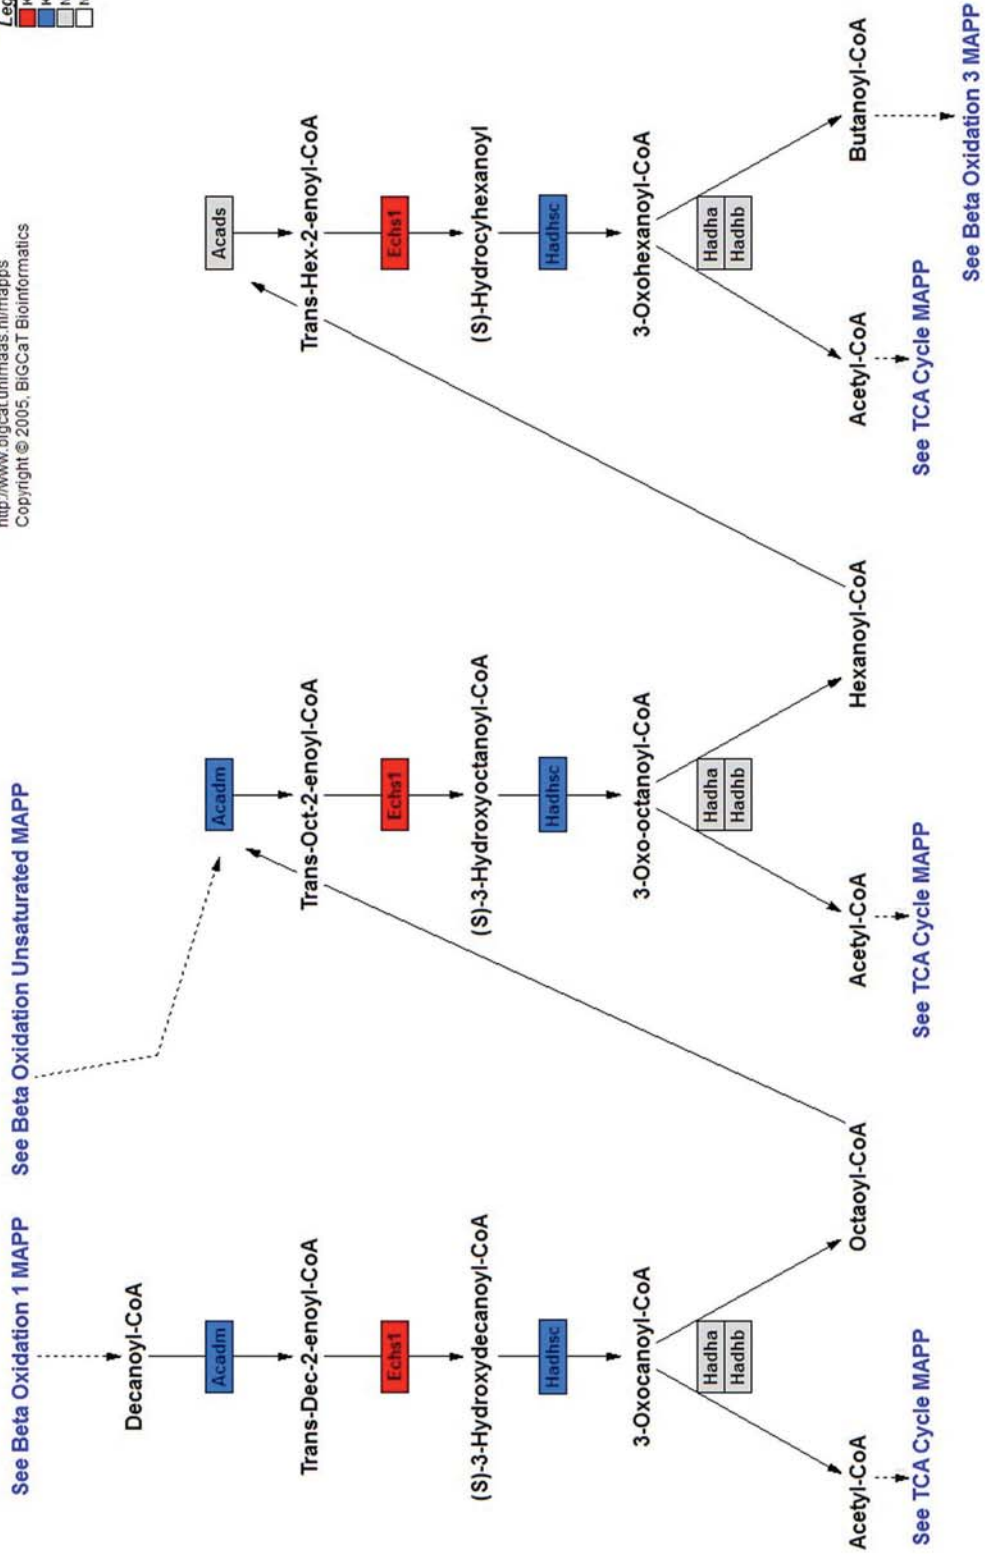



## Fatty Acid Beta Oxidation 3

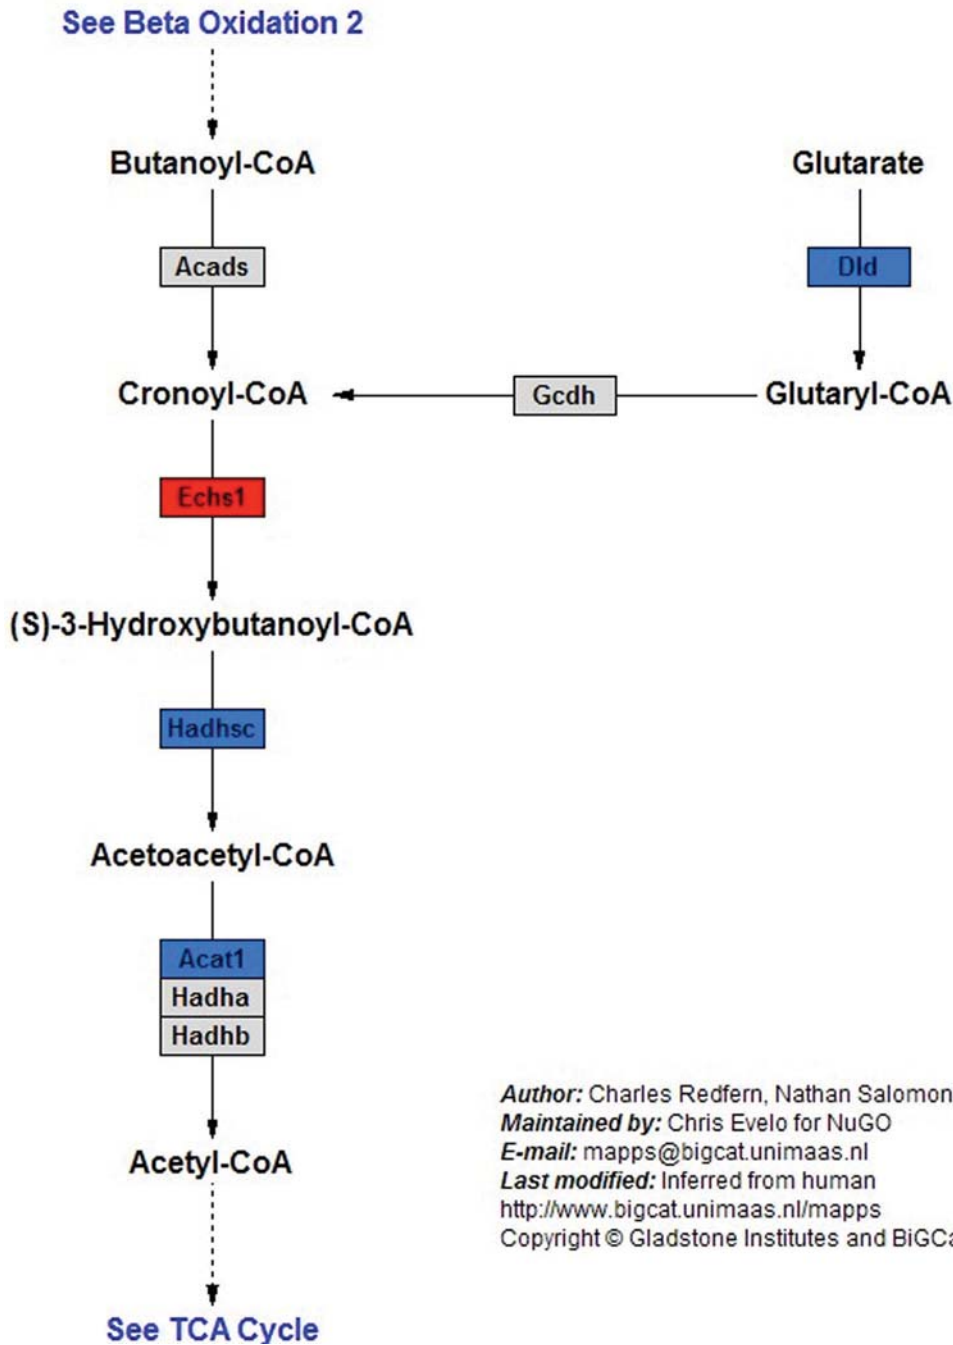

### Gene Database

Mm-Std\_20070817.gdb

### Expression Dataset

Name: fpkm4genMapp

Color Set: KO/WT <= 0.8

Legend: KO/WT <= 0.

Red: KO/WT >= 1.2

Blue: KO/WT <= 0.8

Grey: No criteria met

White: Not found

**Author:** Charles Redfern, Nathan Salomonis and Chris Evelo

**Maintained by:** Chris Evelo for NuGO

**E-mail:** mapps@bigcat.unimaas.nl

**Last modified:** Inferred from human

<http://www.bigcat.unimaas.nl/mapps>

Copyright © Gladstone Institutes and BiGCaT Bioinformatics
