# Supplementary material
Source: PubMed Central journal article supplement (PMC3437840)

# A. Glycolysis and gluconeogenesis

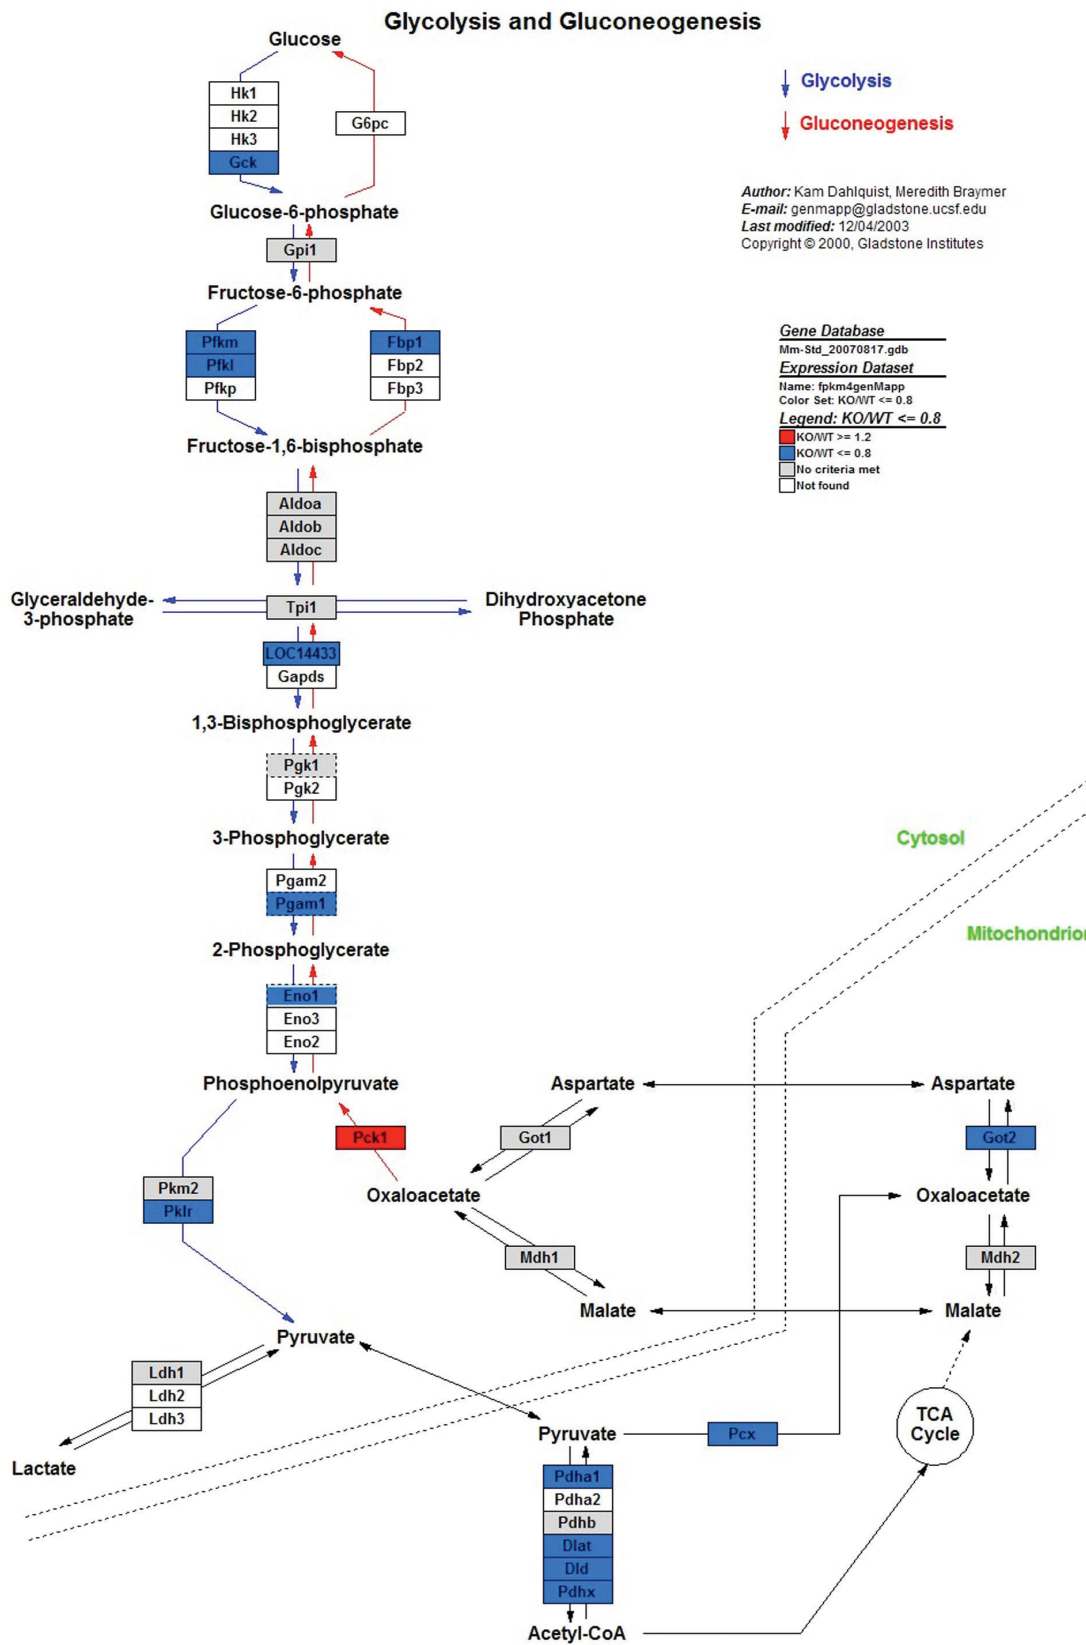

## B. Tricarboxylic acid cycle

Author: Kam Dahlquist, Meredith Braymer  
 E-mail: genmapp@gladstone.ucsf.edu  
 Last modified: 12/4/03  
 Copyright © 2000, Gladstone Institutes

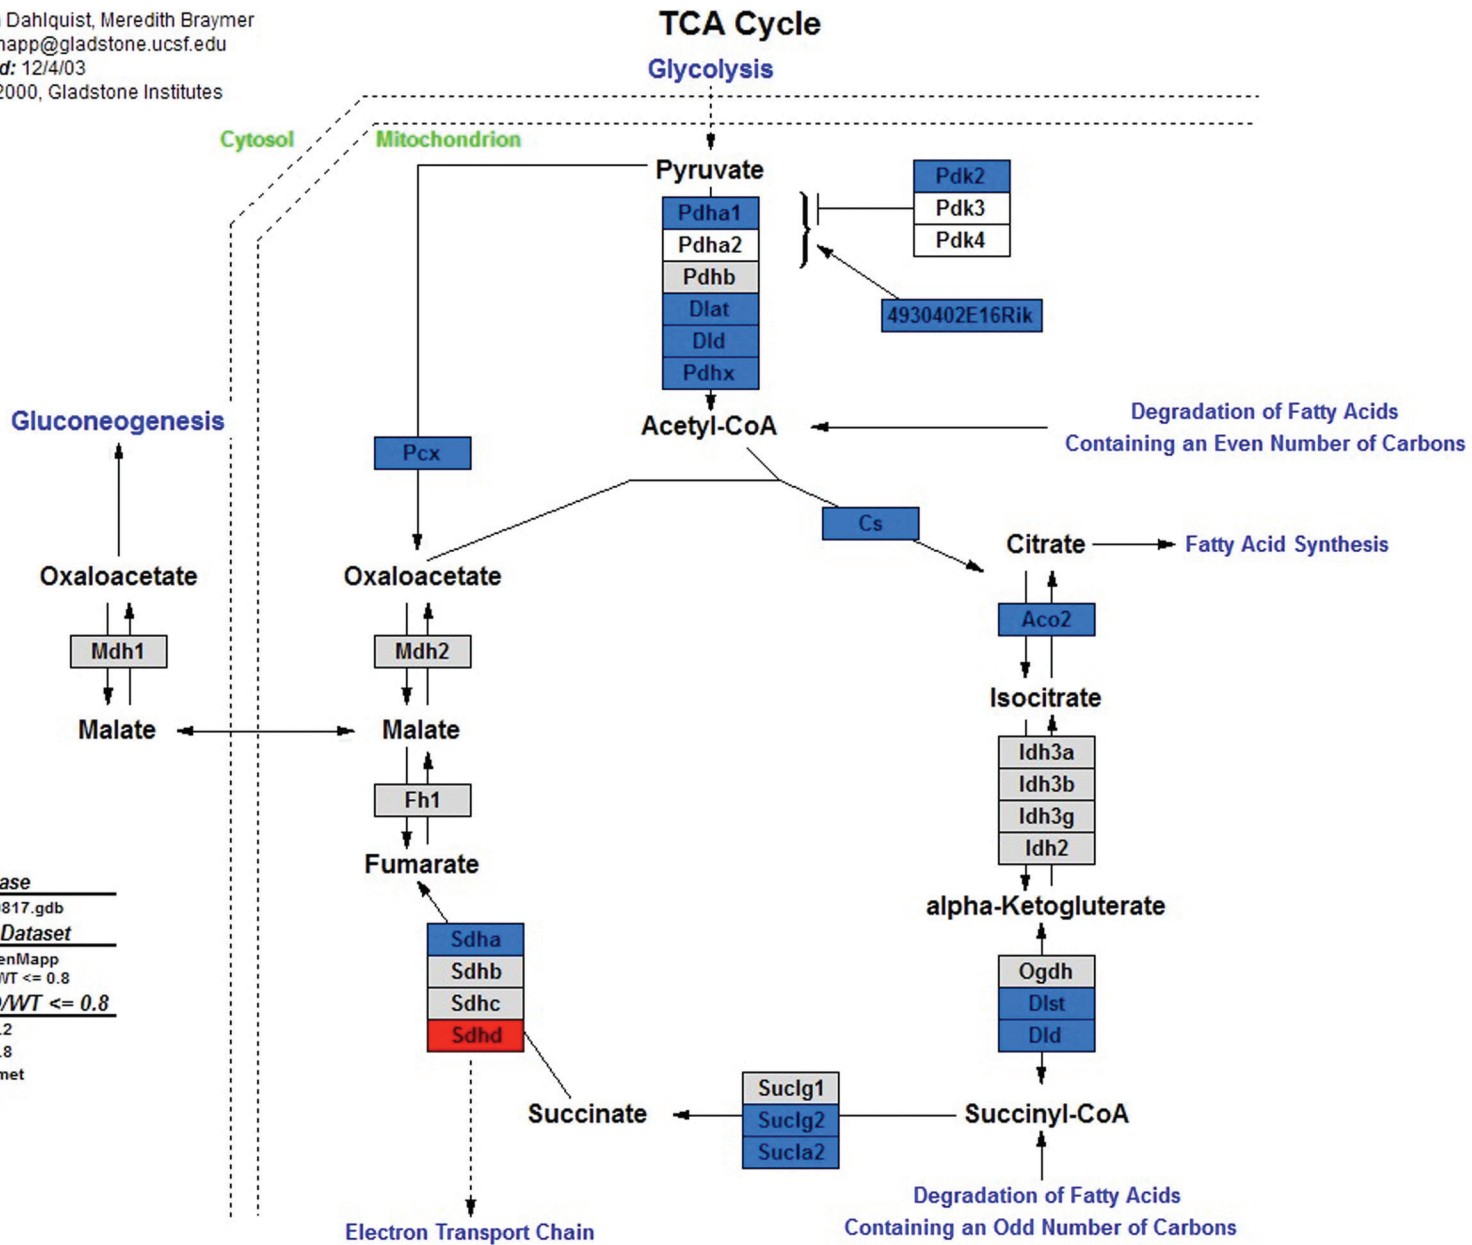

Supplement: 1211611109_sfig02.pdf [file 1211611109_sfig02.pdf]
